# Supplementary material for: Rapid and Accurate Identification of SARS-CoV-2 Variants Using Real Time PCR Assays
Source: Front Cell Infect Microbiol. 2022 May 10;12:894613. doi: 10.3389/fcimb.2022.894613 (PMC9127862; doi:10.3389/fcimb.2022.894613)
Supplement: Supplementary file 1 [file Table_1.xlsx]

## Sheet: S1
Table S1: Viral Copy numbers for Precision Studies
Alpha, Beta and Gamma Variant Assay		SARS-CoV-2 WT (copies/mL)
		Low	Medium	High
	PBS	1000	2500	5000
	UTM	1000	2500	5000
	Saline	2500	5000	10000
		SARS-CoV-2 B.1.1.7 (copies/mL)
		Low	Medium	High
	PBS	5000	10000	20000
	UTM	5000	10000	20000
	Saline	10000	25000	50000
		SARS-CoV-2 P.1 (copies/mL)
		Low	Medium	High
	PBS	25000	50000	100000
	UTM	50000	100000	200000
	Saline	25000	50000	100000
Delta Variant Assay		SARS-CoV-2 WT (copies/mL)
		Low	Medium	High
	PBS	5000	10000	25000
	UTM	5000	10000	25000
		SARS-CoV-2 B.1.617.2 (copies/mL)
		Low	Medium	High
	PBS	5000	50000	100000
	UTM	5000	10000	25000
		SARS-CoV-2 WT (copies/mL)
Lambda Variant Assay		Low	Medium	High
	PBS	5000	10000	25000
	UTM	5000	10000	25000
		SARS-CoV-2 C.37 (copies/mL)
		Low	Medium	High
	PBS	10000	25000	50000
	UTM	10000	25000	250000

## Sheet: S2
Table S2: Specificity Panel
Panel Member	Strain	Source
Adenovirus 1		Zeptometrix
Adenovirus 3		Zeptometrix
Adenovirus 31		Zeptometrix
Bordetella parapertussis	A747	Zeptometrix
Bordetella pertussis	A639	Zeptometrix
Chlamydia pneumoniae	CWL-029	Zeptometrix
Coronavirus 229E		Zeptometrix
Coronavirus HKU-1	Recombinant1	Zeptometrix
Coronavirus NL63		Zeptometrix
Coronavirus OC43		Zeptometrix
Influenza A H1N1pdm	A/NY/02/092	Zeptometrix
Influenza AH1	A/New Caledonia/20/99	Zeptometrix
Influenza AH3	A/Brisbane/10/07	Zeptometrix
Influenza B	B/Florida/02/06	Zeptometrix
Mycoplasma pneumoniae	M129	Zeptometrix
Metapneumovirus 8	Peru6-20033	Zeptometrix
Parainfluenza 1		Zeptometrix
Parainfluenza 2		Zeptometrix
Parainfluenza 3		Zeptometrix
Parainfluenza 4		Zeptometrix
Rhinovirus 1A		Zeptometrix
RSV A		Zeptometrix
SARS-CoV-2	USA-WA1/20204	Zeptometrix
Haemophilus influenzae	MinnA	Zeptometrix
Pseudomonas aeruginosa	Z139 VIM-1	Zeptometrix
Enterovirus D68	US/KY/14-18953	ATCC
Candida albicans		ATCC
Coxsackie A16	2004 isolate	Zeptometrix
Staphylococcus epidermidis	PCI 1200	ATCC
Streptococcus pneumoniae		ATCC
Streptococcus pyogenes	Bruno	ATCC
Legionella pneumophila		ATCC
Staphylococcus aureus	MRSA	Zeptometrix
Negative Control		Zeptometrix

## Sheet: S3
Table S3: Intra-Assay Variability Coefficients of Variation
			CV (%)1
Media	Lineage	Standard	RdRp	E484K	S982A	N501Y	P681R	L452Q
PBS	WT2	High	1.5
		Medium	2.7
		Low	3.6
	B.1.1.7	High	2.9		2.1	0.4
		Medium	1.8		4.1	1.5
		Low	2.8		2.8	0.8
	P.1	High	0.9	1.1		1.7
		Medium	0.4	0.5		0.8
		Low	2.5	0.8		0.8
	B.1.617.2	High	0.8				1.2
		Medium	0.9				1.1
		Low	0.5				3.5
	C.37	High	1.3					0.9
		Medium	0.6					0.4
		Low	1.9					3.7
UTM	WT2	High	0.1
		Medium	1.5
		Low	1.4
	B.1.1.7	High	3.1		0.9	1.8
		Medium	1.5		2.5	0.9
		Low	1.2		1.9	1.8
	P.1	High	1.4	1.5		1.4
		Medium	0.3	0.6		0.7
		Low	3.5	3.3		2.5
	B.1.617.2	High	0.8				0.6
		Medium	1.7				1.9
		Low	1.5				1.4
	C.37	High	1.3					1.1
		Medium	0.8					1
		Low	1.9					3.3
Saline	WT2	High	0.8
		Medium	0.8
		Low	1.8
	B.1.1.7	High	1.2		1.5	1.3
		Medium	1.2		1.6	0.8
		Low	2.5		2.8	0.8
	P.1	High	1.7	1.3		1.3
		Medium	1.1	0.6		0.4
		Low	1.7	1.2		2.1
	B.1.617.2	High	ND3
		Medium
		Low
	C.37	High	ND3
		Medium
		Low

## Sheet: S4
Table S4: Inter-Assay Variability Coefficients of Variation
			CV (%)1
Media	Lineage	Standard	RdRp	E484K	S982A	N501Y	P681R	L452Q
PBS	WT2	High	3.2
		Medium	3
		Low	6.9
	B.1.1.7	High	2.7		3.3	2.4
		Medium	4.1		3.5	4.6
		Low	4.5		3.3	3.9
	P.1	High	1.7	1.7		1.8
		Medium	1.5	2		1.3
		Low	4	2.9		2.3
	B.1.617.2	High	2.9				2.6
		Medium	3.1				2.9
		Low	3.1				2.9
	C.37	High	2.1					1.9
		Medium	1.1					1.1
		Low	3.5					3.5
UTM	WT2	High	2.6
		Medium	5.4
		Low	2.4
	B.1.1.7	High	2		2.3	2.3
		Medium	4		3.3	3.4
		Low	5.7		2.8	3.2
	P.1	High	1.9	1.7		2.5
		Medium	2.3	2.2		2.2
		Low	5.3	2.8		2.8
	B.1.617.2	High	2.9				3.1
		Medium	3.4				3.5
		Low	1.4				1.4
	C.37	High	1.3					1.5
		Medium	3.3					2.1
		Low	2.4					3
Saline	WT2	High	4.8
		Medium	2.5
		Low	2.4
	B.1.1.7	High	1.5		2.2	1.1
		Medium	1.7		2.3	1.4
		Low	4.5		2.6	3.2
	P.1	High	1.2	1		1.3
		Medium	1.7	1.4		0.7
		Low	1.5	1.2		1.3
	B.1.617.2	High	ND3
		Medium
		Low
	C.37	High	ND3
		Medium
		Low

## Sheet: S5
Table S5: Accuracy Panel for Alpha, Beta and Gamma Variant Assay
Lineage	Tested (N)
B.1	4
B.1/E484K	1
B.1.1.1	1
B.1.1.7	242
B.1.2	4
B.1.1.207	1
B.1.234	1
B.1.241	1
B.1.243	1
B.1.1.318	6
B.1.351	3
B.1.427	7
B.1.429	14
B.1.1.519	6
B.1.525	1
B.1.526/E484K	23
B.1.526/WT	6
B.1.526.1	16
B.1.526.2	16
B.1.575	1
B.1.596	1
B.1.617.1	1
B.1.617.2	5
B.1.621	2
B.1.623	3
C.36	1
C.37	1
P.1	27
P.2	1
R.1	1
Subtotal	398
SARS-CoV-2 (-)	20
NTC (water)	19
Total	437

## Sheet: S6
Table S6: Accuracy Panel for Delta and Lambda Variant Assay
SARS-CoV-2 Positive Samples		SARS-CoV-2 Positive Samples
Lineage	Delta Test (N)	Lineage	Lambda Test (N)
AY.12	5	AY.12	4
AY.13	1	AY.13	1
AY.14	10	AY.14	10
AY.16	1	AY.16	1
AY.2	1	AY.2	1
AY.20	3	AY.20	3
AY.23	1	AY.23	1
AY.25	42	AY.25	42
AY.3	74	AY.3	72
AY.3.1	2	AY.3.1	2
AY.4	2	AY.4	2
AY.5	1	AY.5	1
B.1.1.318	2	B.1.1.318	2
B.1.1.519	3	B.1.1.519	3
B.1.1.7	157	B.1.1.7	116
B.1.318	1	B.1.318	1
B.1.351	1	B.1.351	1
B.1.427	1
B.1.526	15	B.1.526	12
B.1.526/E484K	3	B.1.526/E484K	2
B.1.617.2	251	B.1.617.2	235
B.1.621	9	B.1.621	9
B.1.621.1	10	B.1.621.1	7
B.1.628	10	B.1.628	9
B.1.631	1	B.1.631	1
B.1.637	8	B.1.637	5
C.36.3	1	C.36.3	1
C.37	1	C.37	1
P.1	34	P.1	24
P.1.10	9	P.1.10	8
Q.3	4	Q.3	1
Subtotal	664	Total	578
NTC (water)	17	NTC (water)	16

## Sheet: S7
Table S7: Accuracy Panel for the Alpha/Beta/Gamma+ Variant Assay
Lineage	Number tested	Concordant
Omicron (B.1.1.529)	16	16/16
Delta (B.1.617.2)	16	16/16
Alpha (B.1.1.7)	3	3/3
Gamma (P.1)	4	3/4
Omicron (B.1.1.529)-High (25,000 copies/mL)	5	5/5
Omicron (B.1.1.529)-Medium (10,000 copies/mL)	4	4/4
Omicron (B.1.1.529)-Low (2,500 copies/mL)	5	4/5
SARS-CoV-2 WT for N501Y/S982A/E484K	4	4/4
SARS-CoV-2 Negative specimens	5	5/5
